# Supplementary material
Source: PubMed Central journal article supplement (PMC2758762)

## Supplemental Data 2

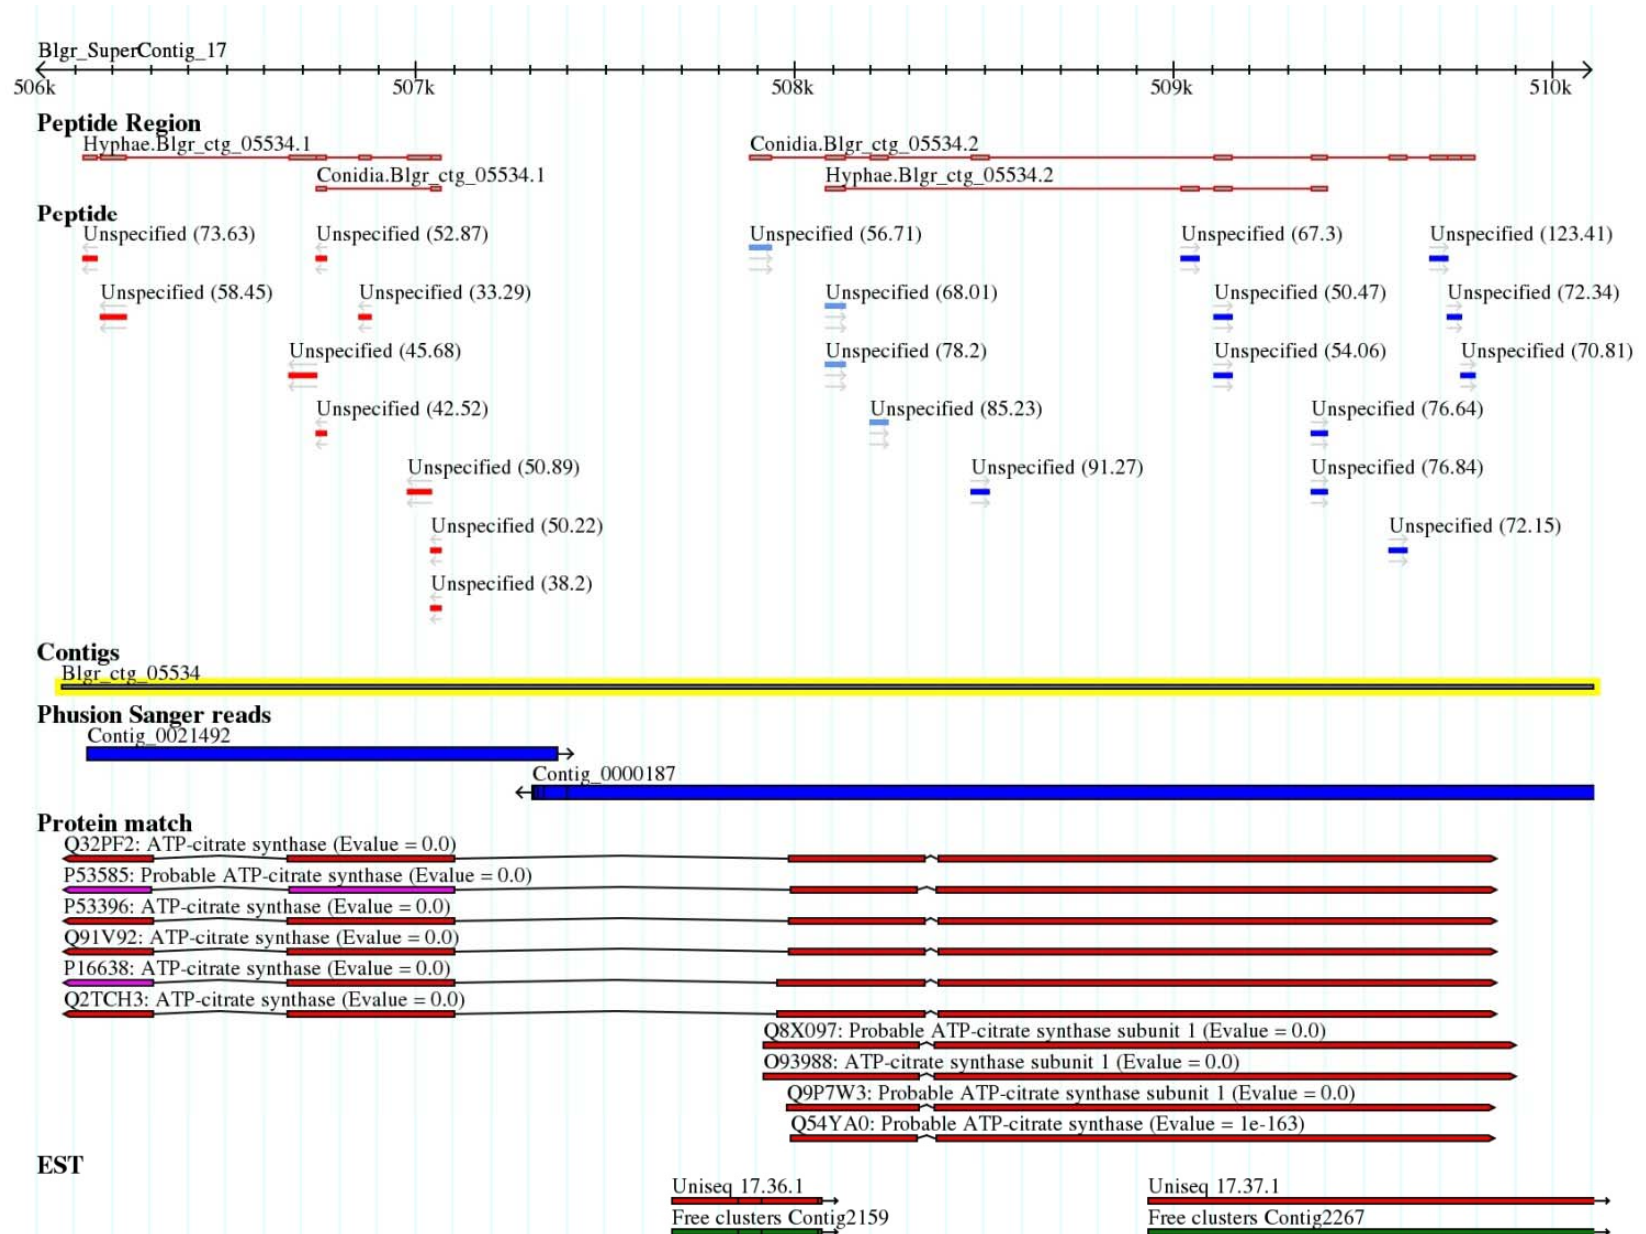

Supplement: M900188-MCP200_1.pdf [file M900188-MCP200_1.pdf]
